# Supplementary material
Source: Research Square preprint supplement (doi:10.21203/rs.3.rs-9607317/v1)
Supplement: Supplementary file 1 [file 9c92c4ab99ba81ec07038c44.docx]

**Molecular Characterization and *In Vitro* Lytic Activity of LysLm680, an Endolysin Derived from Temperate *Listeria* Phages**

Fatma Neslihan ÖZDEMİR, İrem AYAN, Ayşenur YÜCEFAYDALI, Segâh YETİŞKİN, Filiz YENİKÖYLÜ, Yeşim SOYER

*aDepartment of Food Engineering, Faculty of Engineering, Middle East Technical University, Ankara, Türkiye*

***Corresponding author:** Yeşim SOYER (E-mail: [ysoyer@metu.edu.tr](mailto:ysoyer@metu.edu.tr))

**
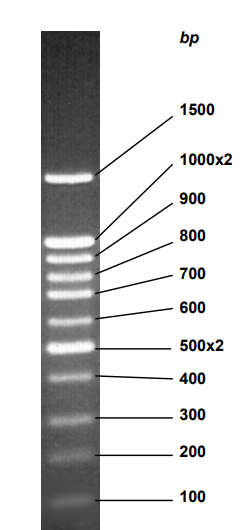
**
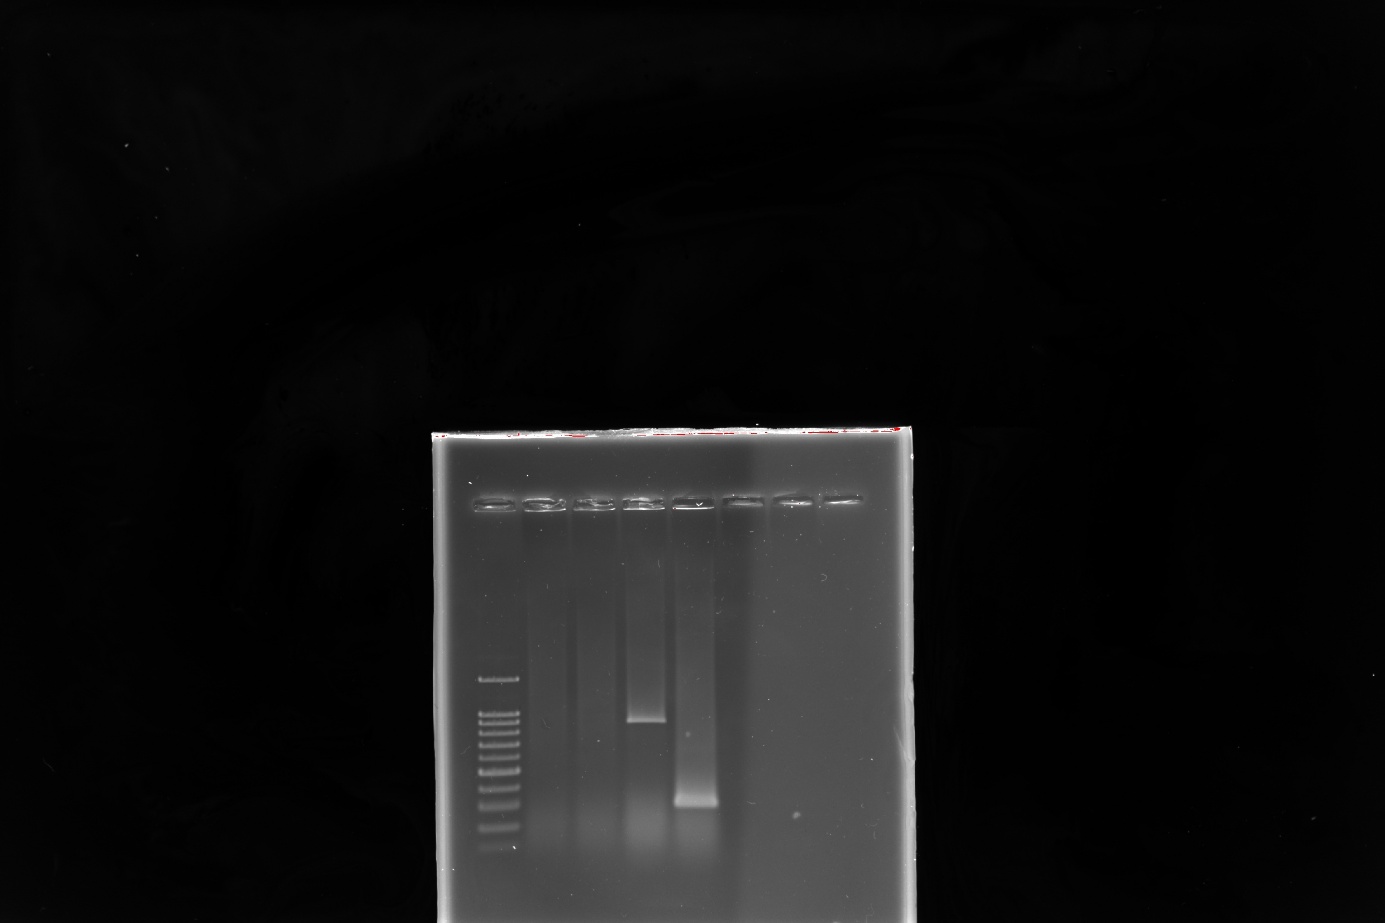


1 2 3 4

**Fig. S1** PCR gel image performed to validate transformants containing the endolysin gene region. The following wells contain the PCR product for pET28a(+) + LysLm680: 1: Ladder; 2: PZR Negative Control; 3: Negative (untransformed) transformant; 4: Positive transformant.


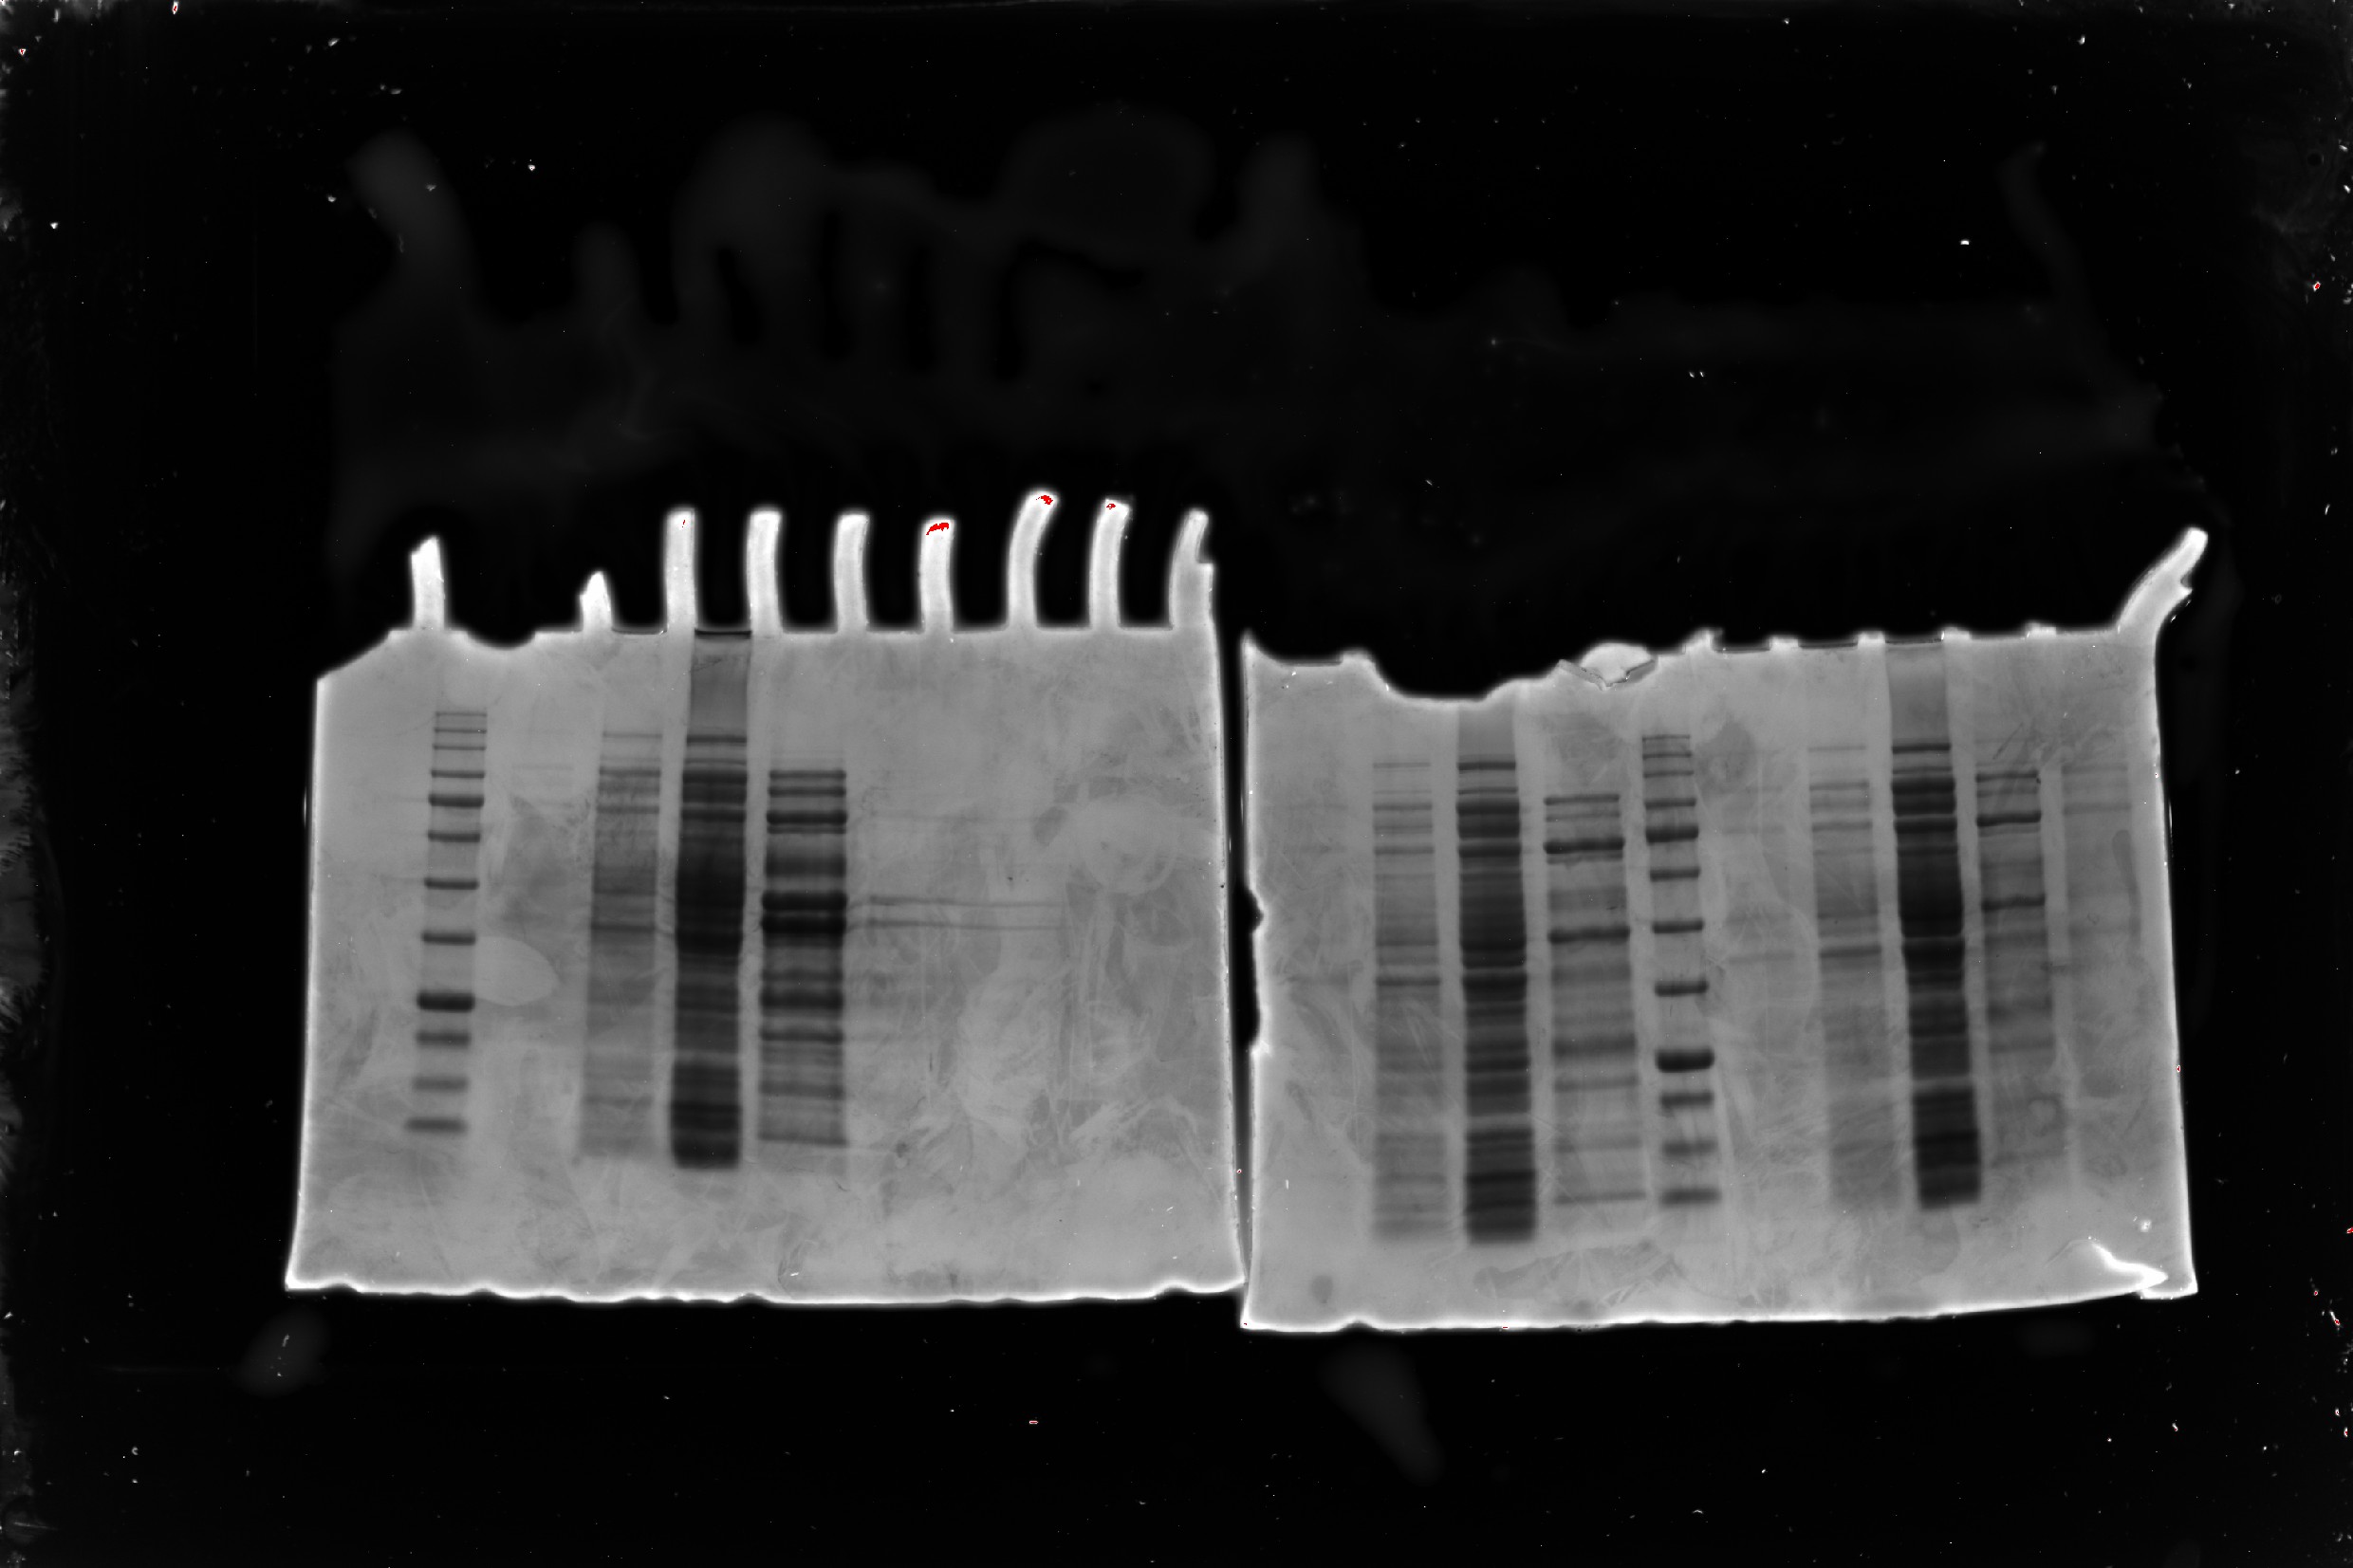

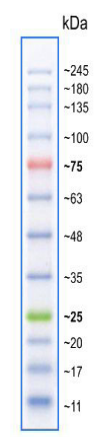


**1 2 3 4 5**

**Fig. S2** SDS–PAGE analysis of LysLm680 expression and purification. 1: protein ladder; 2: non-induced *E. coli* Lemo21(DE3) cell lysate; 3: IPTG-induced *E. coli* Lemo21(DE3) cell lysate; 4: clarified lysate of IPTG-induced *E. coli* Lemo21(DE3); 5: purified LysLm680.
